# Supplementary material for: Influence from the types of surface functional groups of RGO on the performances of thermal interface materials
Source: Royal Society of Chemistry journal article supplement (doi:10.1039/c7ra12034f), 2017-01-01
Supplement: c7ra12034f1.pdf [file c7ra12034f1.pdf]

Supplementary Information for

## Influence from the types of surface functional groups of RGO on the performances of thermal interface materials

Yunfei Sun<sup>a\*</sup>, Yanfeng He<sup>b</sup>, Bo Tang<sup>b\*</sup>, Chongben Tao<sup>a</sup>, Jianmin Ban<sup>a</sup>, Li Jiang<sup>a</sup>

<sup>a</sup>College of Electronic and Information Engineering, Suzhou University of Sciences and  
Technology, Suzhou, Jiangsu 215009, People's Republic of China

<sup>b</sup>School of Petroleum Engineering, Changzhou University, Changzhou city 213016, China.

Corresponding authors: 113965203@qq.com; tangbo@cczu.edu.cn.

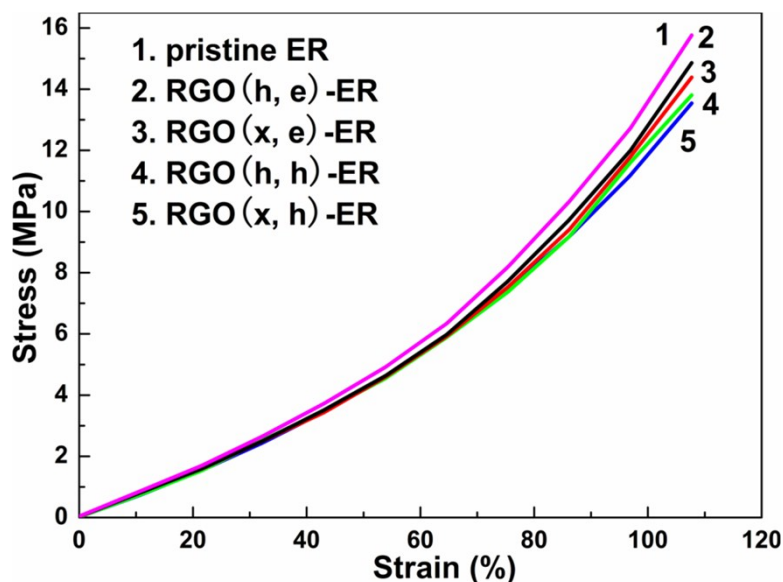

Fig. S1 Stress-strain curves of the pristine ER and resulting TIMs.

Table S1 Mechanical performances of various samples.

| Samples | Properties        | Ultimate strength<br>(enhancement factor) | Stretch limits<br>(strain %) |
|---------|-------------------|-------------------------------------------|------------------------------|
|         | Pristine ER       |                                           | 1                            |
|         | RGO (h, e)-5 wt%  | 0.98                                      | 220                          |
|         | RGO (x, e)-5 wt%  | 0.97                                      | 220                          |
|         | RGO (h, h)-5 wt%  | 0.94                                      | 200                          |
|         | RGO (x, h)-5 wt%  | 0.94                                      | 210                          |
|         | RGO (h, e)-10 wt% | 0.96                                      | 210                          |
|         | RGO (x, e)-10 wt% | 0.96                                      | 210                          |
|         | RGO (h, h)-10 wt% | 0.93                                      | 210                          |
|         | RGO (x, h)-10 wt% | 0.92                                      | 200                          |
